# Supplementary material for: A ketimine–ketoenamine-linked porous organic polymer: synthesis, characterization and applications
Source: Royal Society of Chemistry journal article supplement (doi:10.1039/d4nj04667f), 2024-12-19
Supplement: d4nj04667f1.pdf [file d4nj04667f1.pdf]

# *Supporting information*

# **Ketimine and $\beta$ -ketoenamine Contained Porous Organic Polymer for Adsorbing CO<sub>2</sub> and Catalyzing Knoevenagel Reaction**

Guoxin Cui, Yan Li, Guan Yun, Yongzheng Zhao, Peng Gu, Jing Li, Jinghan Zhang, Shuxin Cui, Minghao Liu, Weiqi Zeng, Zhenlu Wang, Jian Jiang

## **Contents**

| <b>Section</b> |                                                                     | <b>Page No.</b> |
|----------------|---------------------------------------------------------------------|-----------------|
| S-1            | <b>Experimental methods</b>                                         | <b>S2</b>       |
| S-2            | <b>Study of Conformations of BL with Materials Studio</b>           | <b>S6</b>       |
| S-3            | <b>Characterization of BL</b>                                       | <b>S7</b>       |
| S-4            | <b>PXRD of BL-TP-POP</b>                                            | <b>S9</b>       |
| S-6            | <b>Morphology studies</b>                                           | <b>S11</b>      |
| S-5            | <b>Calculation of surface area with multi-point BET plot</b>        | <b>S10</b>      |
| S-7            | <b>Linear fitting of the low-pressure Henry region</b>              | <b>S12</b>      |
| S-8            | <b>Nonlinear Curve fitting with Toth equation</b>                   | <b>S14</b>      |
| S-9            | <b>Studies of Fluorescence</b>                                      | <b>S15</b>      |
| S-10           | <b>UV-Vis DRS spectrum of BL-TP-POP and monomers</b>                | <b>S16</b>      |
| S-11           | <b>Chemical stability studies</b>                                   | <b>S17</b>      |
| S-12           | <b>Recyclability of the the adsorbent</b>                           | <b>S18</b>      |
| S-13           | <b>Knoevenagel reaction related graphs</b>                          | <b>S19</b>      |
| S-14           | <b>Reaction condition studies</b>                                   | <b>S20</b>      |
| S-15           | <b>CO<sub>2</sub> uptake capacity compared with other materials</b> | <b>S22</b>      |
| S-16           | <b>Studies of binding sites with Materials Studio</b>               | <b>S23</b>      |
| S-17           | <b>References</b>                                                   | <b>S24</b>      |

### ***Section S-1: Experimental methods***

**Cyclic voltammetry measurement:** Cyclic voltammetry (CV) experiment was measured on a CHI 900C in a three-electrode electrochemical cell with a scan rate of 0.10 V s<sup>-1</sup>. The experiment was conducted in anhydrous acetonitrile with tetrabutylammonium hexafluorophosphate (0.1 M) as supporting electrolyte. The auxiliary electrode was a platinum wire. The reference electrode was based on the AgCl/Ag couple. The working electrode was a glassy carbon electrode. Ferrocene/ferrocenium (Fc/Fc<sup>+</sup>) redox potential was measured at the end of the experiment to calibrate the pseudo reference electrode as recommended by IUPAC. To prepare the sample for CV measurement, POP powder was dispersed in ethanol with a few droplets of 5 wt% Nafion and stirred for 3h. The suspension was then dropped on the glassy carbon electrode and dried in air to form thin film for measurements.

HOMO and LUMO level are determined as follows<sup>1</sup>:

$$E_{\text{HOMO}} = - [E_{\text{ox\_onset}} - E(\text{Fc}/\text{Fc}^+) + 4.8] \text{ eV}$$

$$E_{\text{LUMO}} = - [E_{\text{red\_onset}} - E(\text{Fc}/\text{Fc}^+) + 4.8] \text{ eV}$$

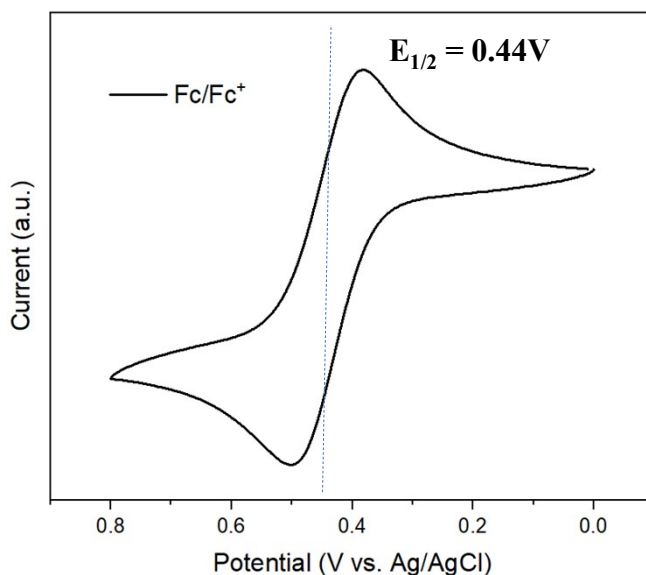

**Figure S1.** Cyclic voltammety measurements of ferrocene/ferrocenium couple to calibrate the pseudo reference electrode.

**Stability test and recovery methods of POP:** The **BL-TP-POP** sample (150 mg) was dispersed in different solvents including water, THF, CH<sub>2</sub>Cl<sub>2</sub>, aqueous HCl (3 M), aqueous NaOH (3 M). The mixtures were stirred for 24 hours.

The POP samples in water, THF, CH<sub>2</sub>Cl<sub>2</sub> were collected by filtration and dried at 120 °C under vacuum for 12 hours. The sample in the aqueous HCl solution was washed with water (5 × 10 mL), neutralized with triethylamine/acetone solution (5%, 1 × 10 mL), washed again with water (5 × 10 mL), and dried under vacuum at 120 °C for 12 h. POP sample in aqueous NaOH solution was washed with water (20 × 10 ml) and dried under vacuum at 120 °C for 12 h. These samples were then used for FTIR measurements.

**Calculation of isosteric heat of adsorption (Q<sub>st</sub>):** The CO<sub>2</sub> adsorption isotherms measured at 273 K and 298 K were first fitted to the following Toth equation,

$$A = \frac{qbp}{[(1 + bp)^t]^{1/t}}$$

Where  $A$  is the adsorbed amount in equilibrium (mmol/g);  $p$  is the equilibrium pressure of the bulk gas (kPa);  $q$  is the saturation capacity of CO<sub>2</sub>;  $b$  and  $t$  are fitting parameters of Toth equation. The isosteric heat of adsorption was calculated from the following equation,

$$Q_{st} = \frac{(\ln p_2 - \ln p_1)RT_2T_1}{T_2 - T_1}$$

Where  $R$  is the gas constant (8.314 J K<sup>-1</sup> mol<sup>-1</sup>);  $T_2$  and  $T_1$  are different temperatures;  $p_2$  and  $p_1$  are equilibrium pressures when different amounts of CO<sub>2</sub> (mmol/g) was adsorbed at  $T_2$  and  $T_1$ , respectively.

**Calculation of selectivity based on Henry's law:** The CO<sub>2</sub>/N<sub>2</sub> Henry selectivity was calculated from Henry's law under low pressure up to 0.15 bar. The single component of both CO<sub>2</sub> and N<sub>2</sub> adsorption isotherms were fitted linearly. Then, their slope ratio showed the corresponding selectivity of CO<sub>2</sub>/N<sub>2</sub>.

**Calculation of percentage yield of the product of Knoevenagel reaction:** A series of benzylidenemalononitrile/benzene solutions with different concentrations were prepared. After running in GC-MS, the working curve was made based on the integral areas of different solutions. The actual yield of product of Knoevenagel reaction in this study was calculate based on the working curve. Then the percentage yield was calculated from the following equation,

$$\text{Yield (\%)} = \text{yield}_{\text{actual}} / \text{yield}_{\text{theoretical}}$$

**Determination of average lifetime of fluorescence:** The y-axis of fluorescence decay plot was first converted to logarithmic scale and normalized. The decay curve was then fitted with the following EXPDEC2 function,

$$y = A_1 e^{-x/t_1} + A_2 e^{-x/t_2}$$

Where  $y$  is the normalized log fluorescence intensity as a function of time  $x$ ;  $t_1$  and  $t_2$  are fluorescence lifetimes of the 1<sup>st</sup> and 2<sup>nd</sup> decay component;  $A_1$  and  $A_2$  are the fractional amplitude of corresponding component. After  $A_1$ ,  $t_1$ ,  $A_2$  and  $t_2$  were obtained from the fitting, the average lifetime ( $t$ ) of the fluorescence was calculated as the following function,

$$t = \frac{A_1 t_1^2 + A_2 t_2^2}{A_1 t_1 + A_2 t_2}$$

### **Computational Methodology:**

Location simulations were performed by using a Sorption module of Materials Studio. The Metropolis Monte Carlo method was chosen for the calculation of binding locations. Universal force field (UFF) was used for the energy calculation, and the charge equilibration (Qeq) method was chosen for the calculation of point atomic charges. Ewald & Group was utilized as the electrostatic interaction method. Simulation temperature: 273 K; equilibrium steps: 100000, production steps: 10000000.

DFT calculation was performed by the DMol<sup>3</sup> program in the Materials Studio. The exchange-correlation interactions were treated according to the generalized gradient approximation (GGA) parameterized by the Becke-Lee-Yang-Parr function (BLYP). A double numerical basis set with polarization function (DNP) was used in DFT calculation without any symmetry constraints. Van der Waals dispersion corrections were treated by the Grimme DFT-D method. All-electron numerical method was selected for core treatment. A smearing of 0.005 Ha was applied for the structure optimization. SCF tolerance was set as  $1.0 \times 10^{-6}$ .

Conformer calculation was performed by the Conformers module of Materials Studio. Systematic grid scan was used as search method. Universal force field (UFF) was used for energy calculation and charge equilibration (Qeq) method was chosen for the calculation of point atomic charge. Atom based was utilized as the electrostatic interaction method.

## Section S-2. Study of Conformations of BL with Materials Studio

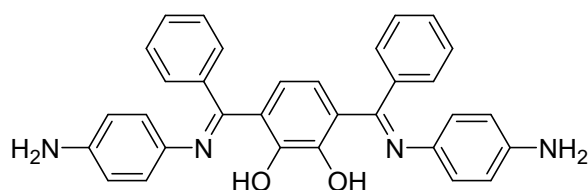

**Figure S2.** The structure of **BL**

Because of steric-hindrance effect, the ketimine phenyl rings prevented **BL** from giving planar structure. To study the conformation of **BL**, we used Materials Studio software package to construct model of the structure (Hydrogen bonding between -OH and -N= was set in the model, because  $^1\text{H}$  NMR of **BL** showed the chemical shift of proton on -OH was 15.54 ppm, which indicated intramolecular hydrogen bonding was formed.). Calculation, with Conformers module (universal forcefield), exhibited there were at least 24928 conformers with similar energy, and all these conformers were nonplanar and twisted. The result indicated that **BL** was nonplanar and very flexible although all double bonds were conjugated in the system. Several conformers with calculated energy were shown below:

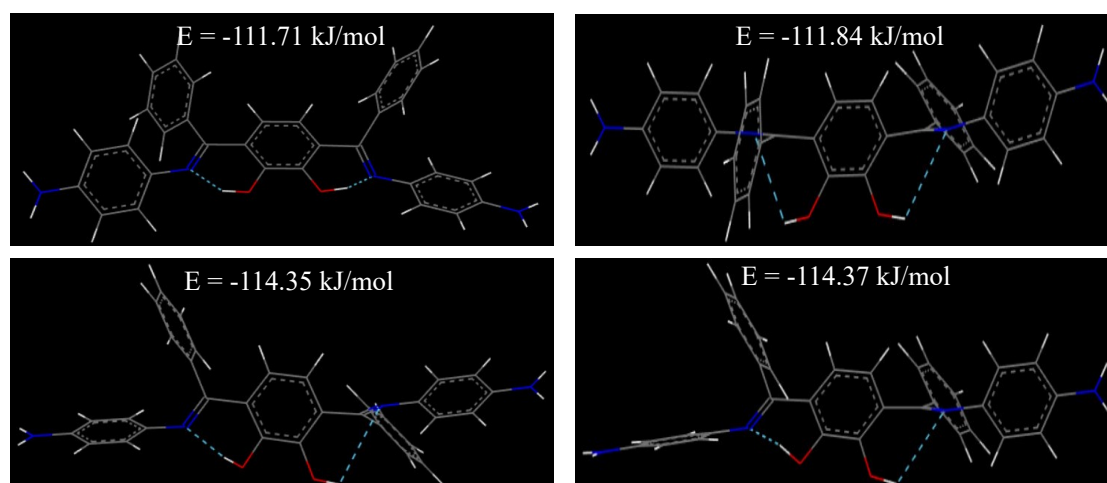

**Figure S3.** Several conformers of BL with calculated energy

*Section S-3. Characterization of BL*

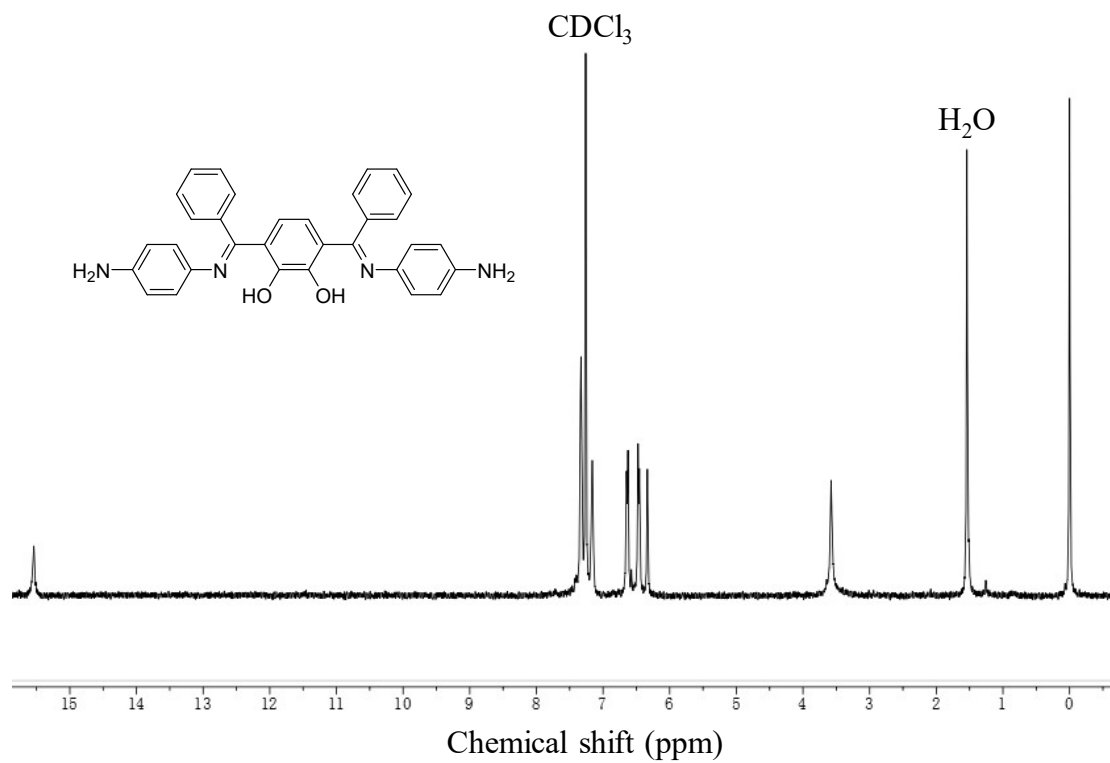

**Figure S4.** <sup>1</sup>H NMR spectrum of **BL** in CDCl<sub>3</sub> (400 MHz, 298K).



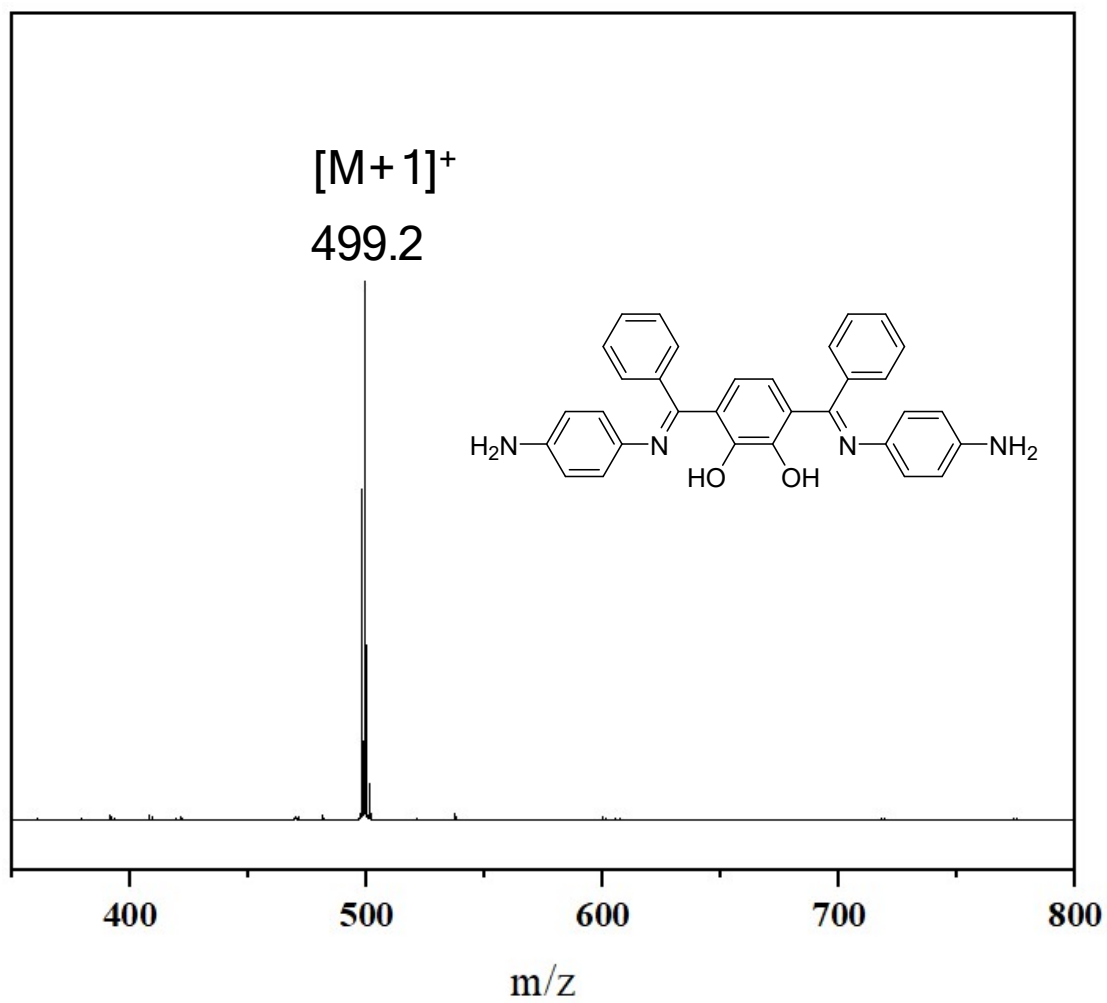

**Figure S5.** MOLDI-TOF MS spectrum of BL

*Section S-4. PXRD of BL-TP-POP*

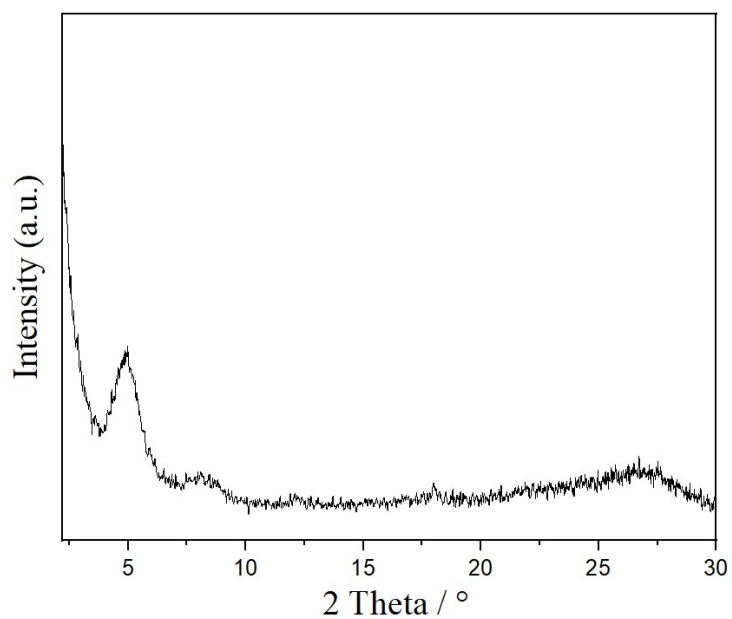

**Figure S6.** PXRD of **BL-TP-POP**

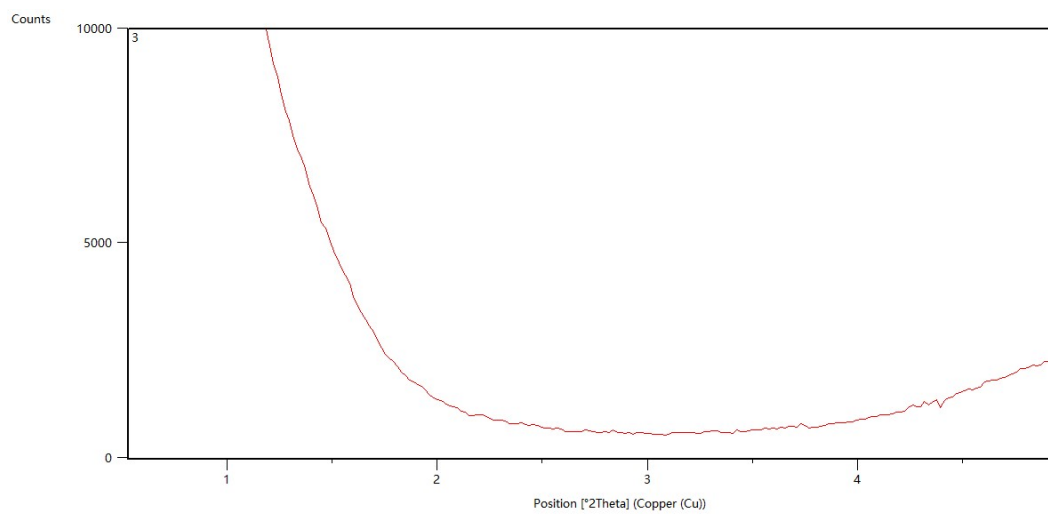

**Figure S7.** Small angle X-ray Scattering of **BL-TP-POP**

*Section S-5. Calculation of surface area with multi-point BET plot*

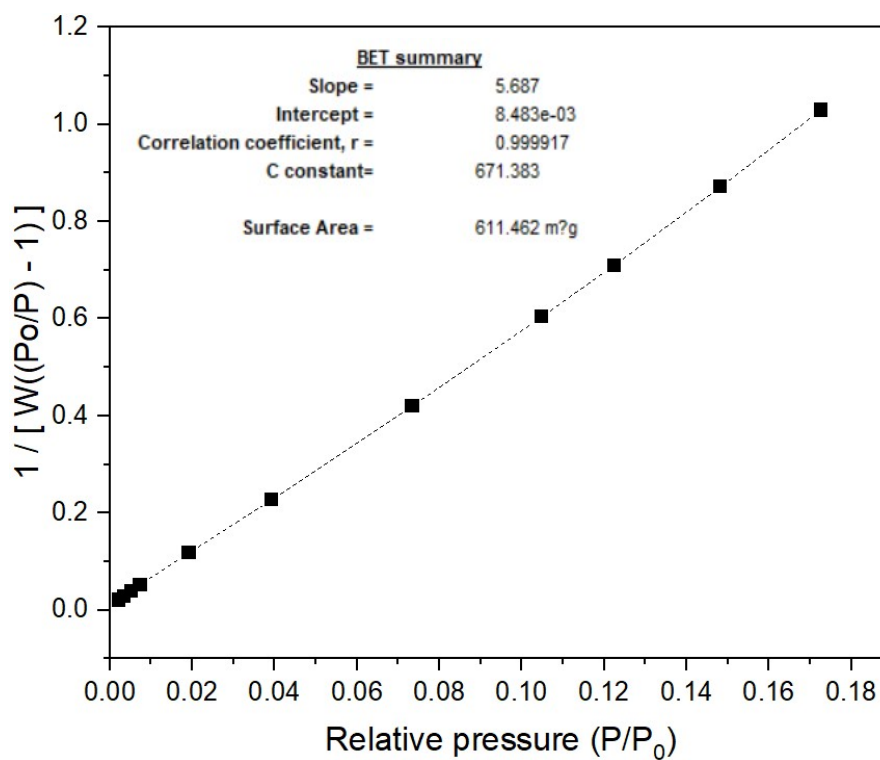

**Figure S8.** Plot of linear region for the BET equation of **BL-TP-POP**.

*Section S-6: Morphology studies*

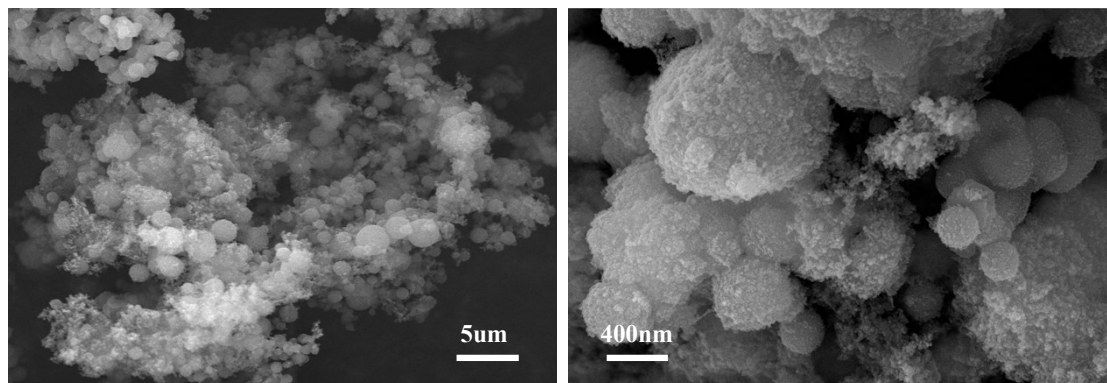

**Figure S9.** SEM images of **BL-TP-POP**

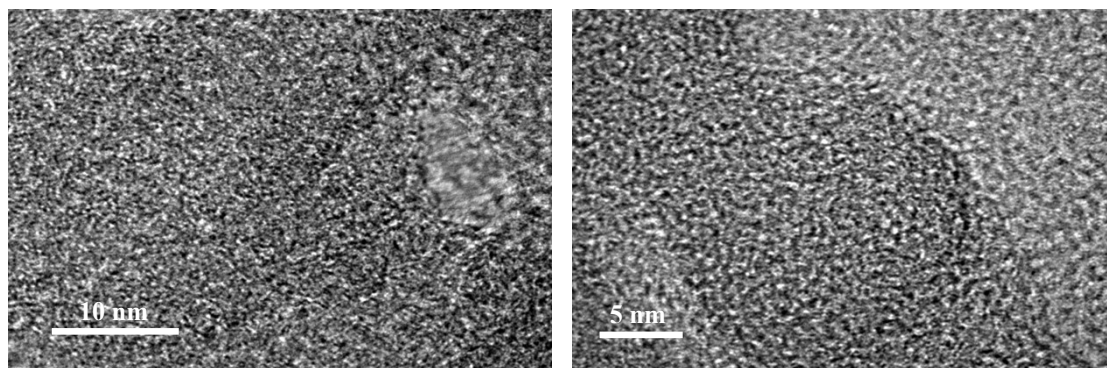

**Figure S10.** HR-TEM images of **BL-TP-POP**

**Section S-7. Linear fitting of the low-pressure Henry region**

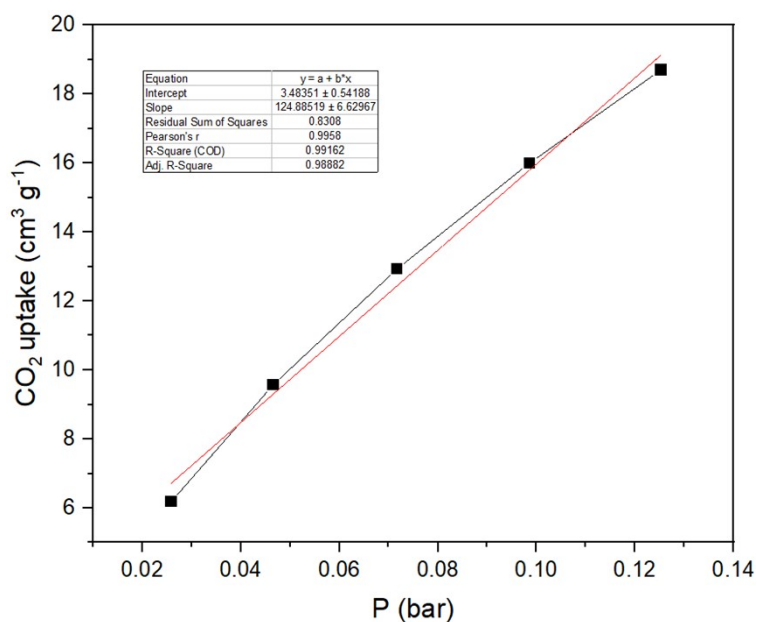

**Figure S11.** Linear fitting of the low-pressure Henry region of CO<sub>2</sub> adsorption isotherms on BL-TP-POP measured at 273 K.

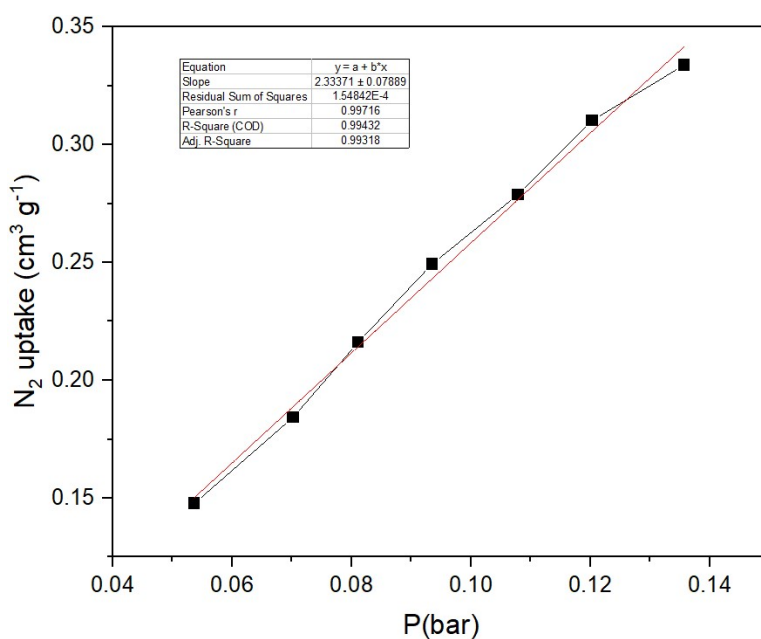

**Figure S12.** Linear fitting of the low-pressure Henry region of N<sub>2</sub> adsorption isotherms on BL-TP-POP measured at 273 K.

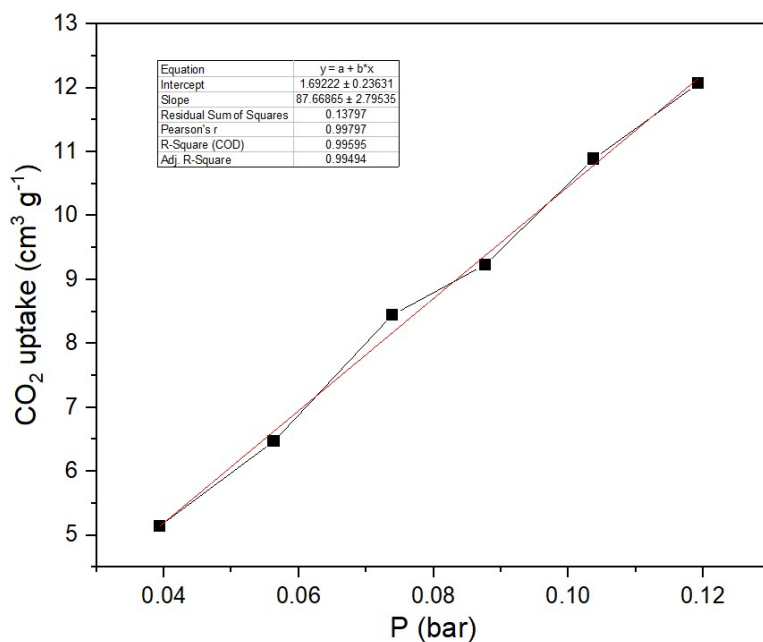

**Figure S13.** Linear fitting of the low-pressure Henry region of CO<sub>2</sub> adsorption isotherms on **BL-TP-POP** measured at 298 K.

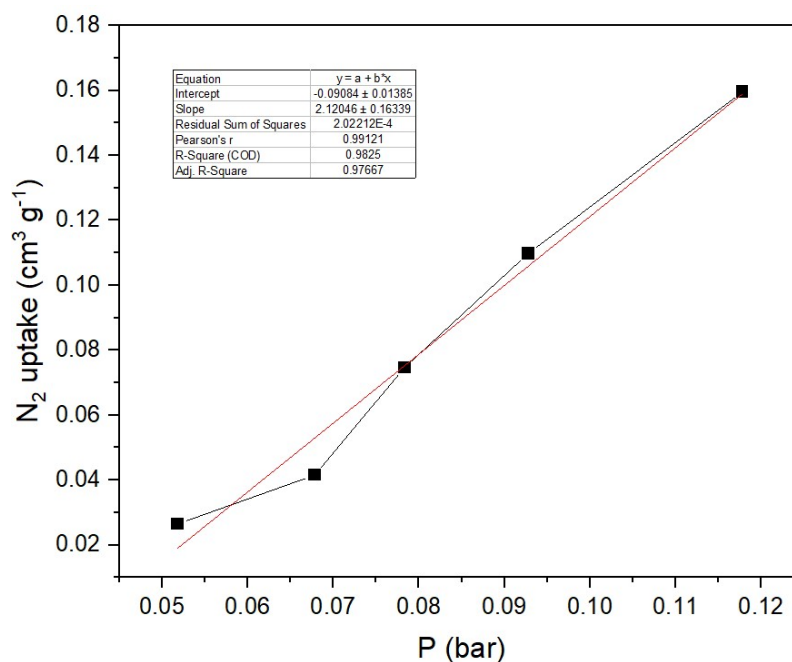

**Figure S14.** Linear fitting of the low-pressure Henry region of N<sub>2</sub> adsorption isotherms on **BL-TP-POP** measured at 298 K.

**Section S-8. Nonlinear Curve fitting with Toth equation**

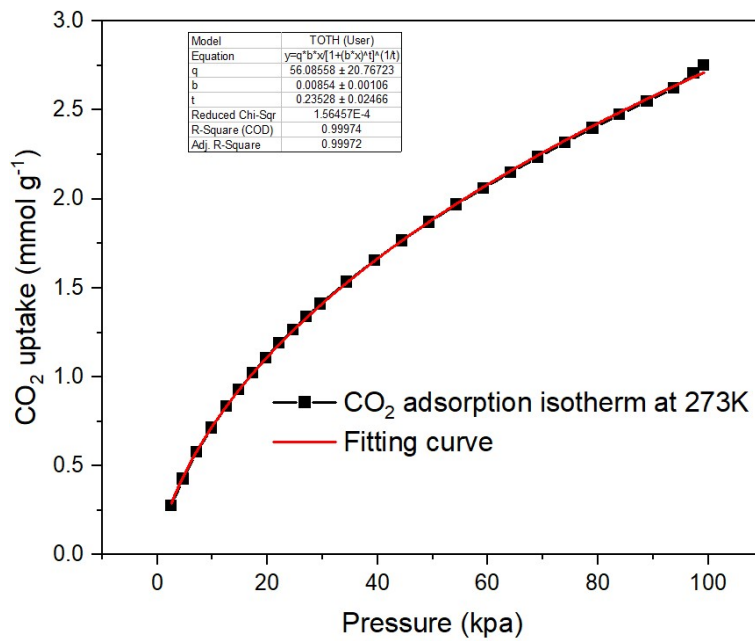

**Figure 15.** Nonlinear curve fitting of CO<sub>2</sub> adsorption isotherm at 273K with Toth equation.

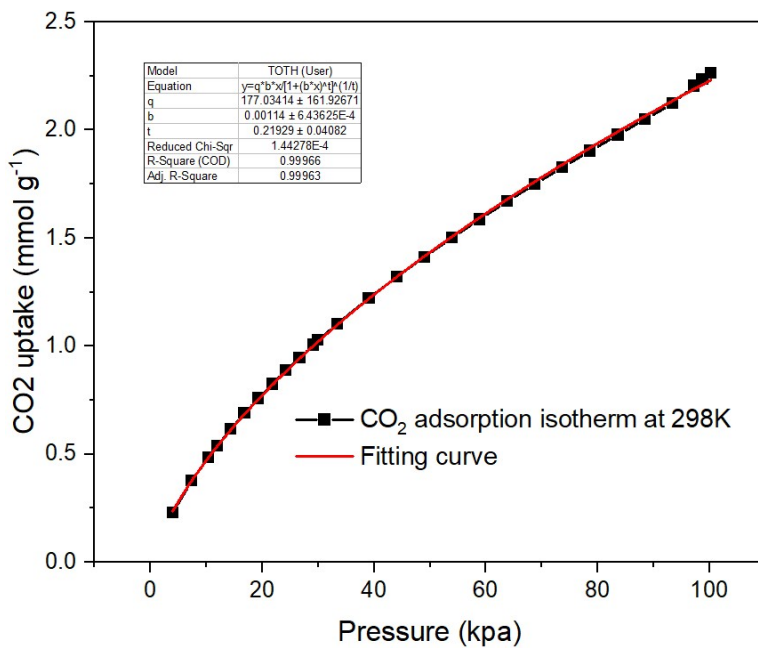

**Figure 16.** Nonlinear curve fitting of CO<sub>2</sub> adsorption isotherm at 298K with Toth equation.

Section S-9. Studies of Fluorescence

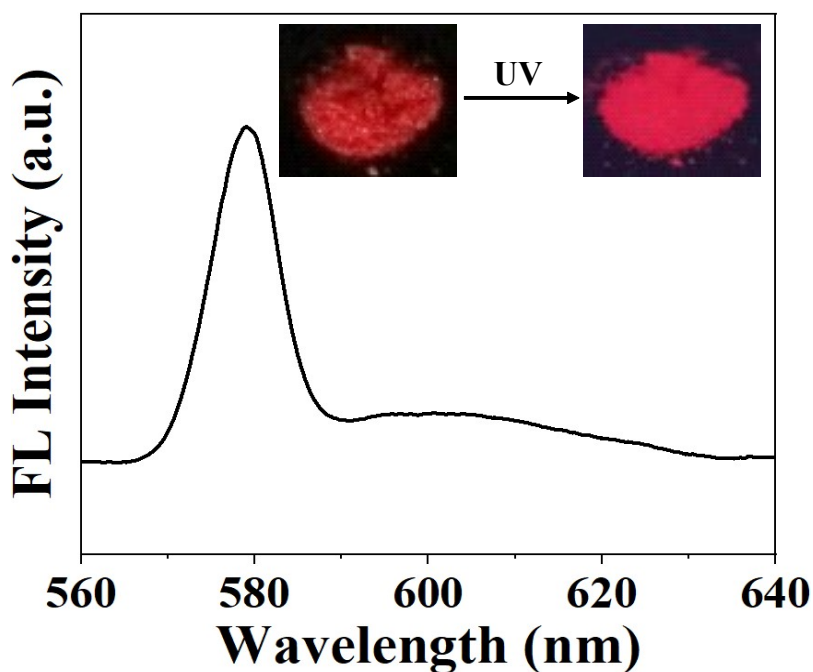

**Figure S17.** Fluorescence emission spectrum of BL-TP-POP (insert: photographs of POP powder before and after irradiation under 365 nm UV lamp).

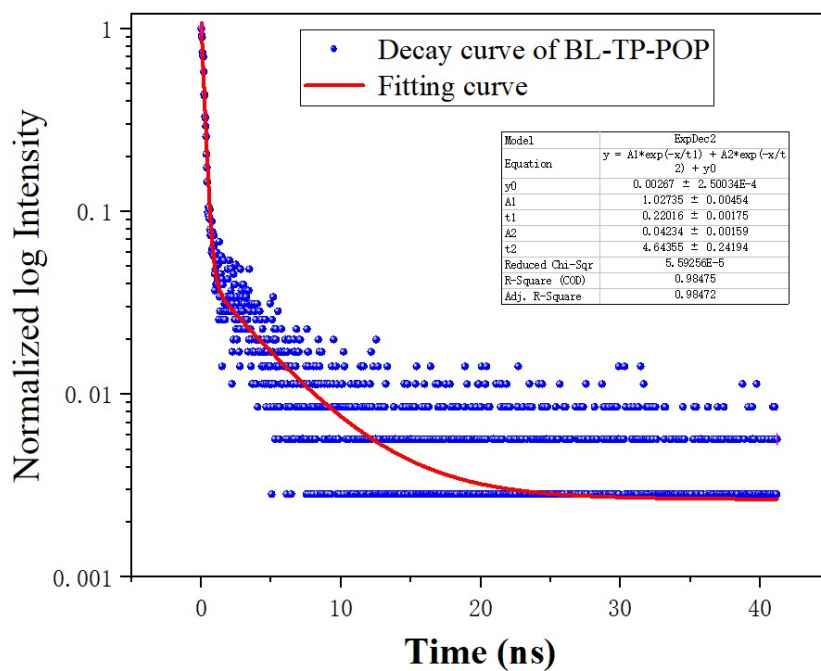

**Figure 18.** Time-resolved fluorescence lifetime decay spectra and curve fitting with EXPDEC2 function.



*Section S-10. UV-Vis DRS spectrum of BL-TP-POP and monomers*

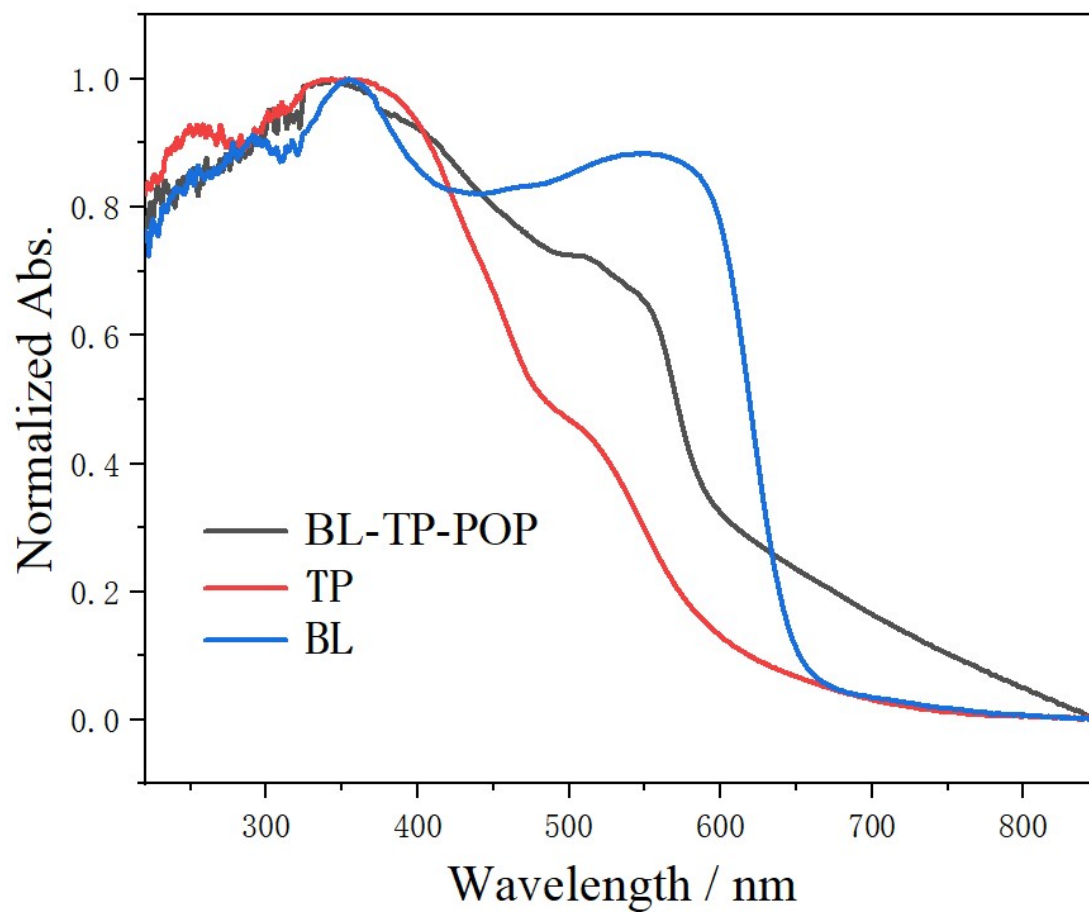

**Figure S19.** UV-Vis DRS spectra of **BL-TP-POP**, **TP** and **BL**.

*Section S-11: Chemical stability studies*

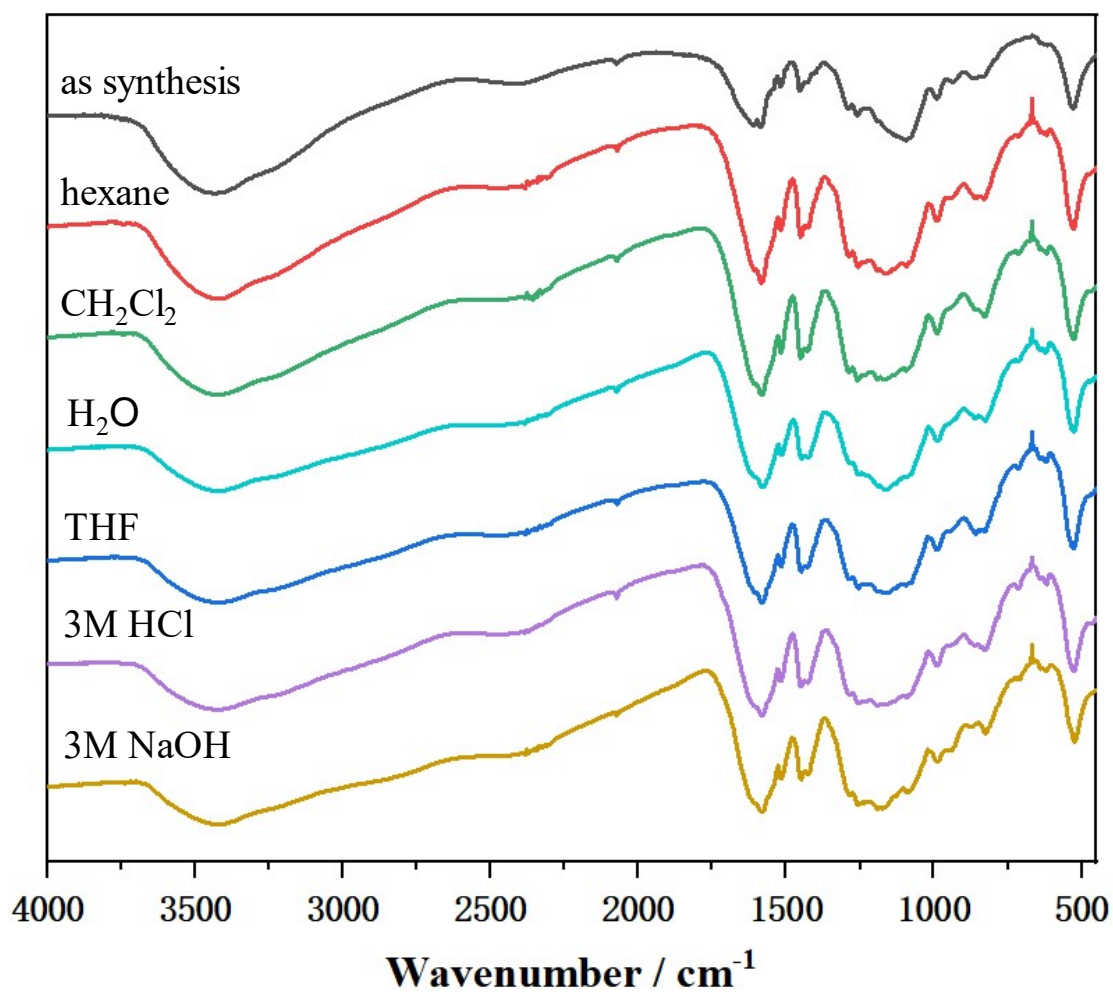

**Figure S20.** FT-IR spectra of recovered **BL-TP-COF** after immersed in different solvents (7 days for hexane, CH<sub>2</sub>Cl<sub>2</sub>, H<sub>2</sub>O, THF and 3M HCl; 1 day for 3M NaOH).

*Section S-12. Recyclability of the the adsorbent*

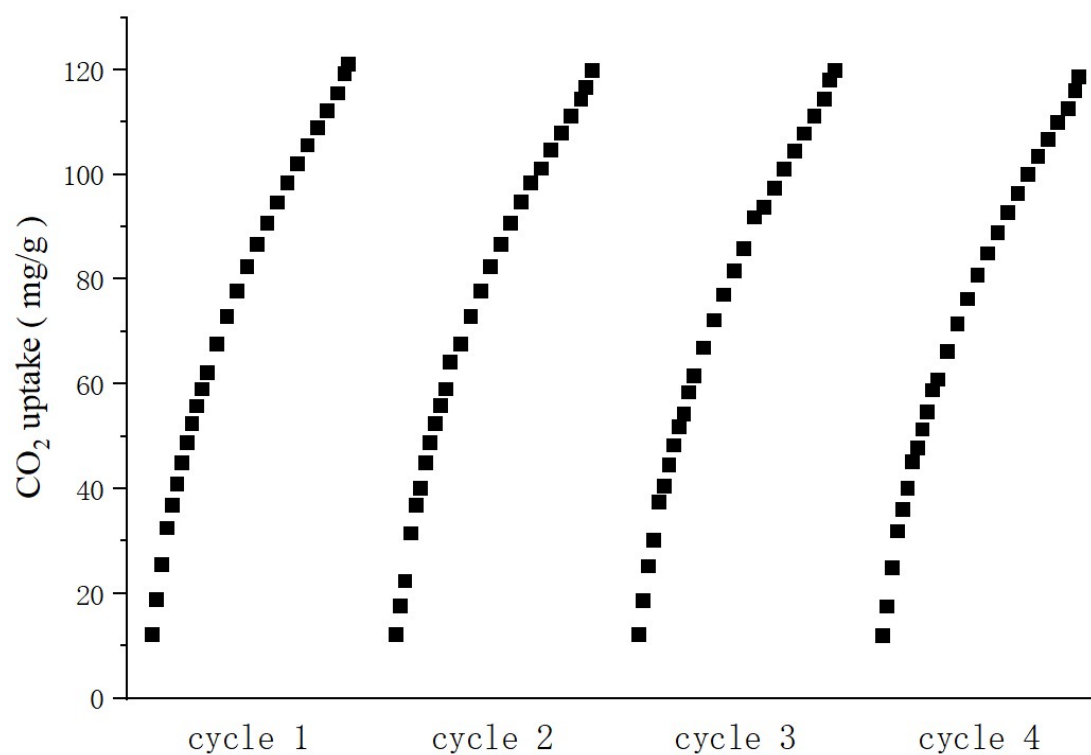

**Figure S21.** Recycle of CO<sub>2</sub> adsorption by **BL-TP-POP** at 273K.

**Section S-13. Knoevenagel reaction related graphs**

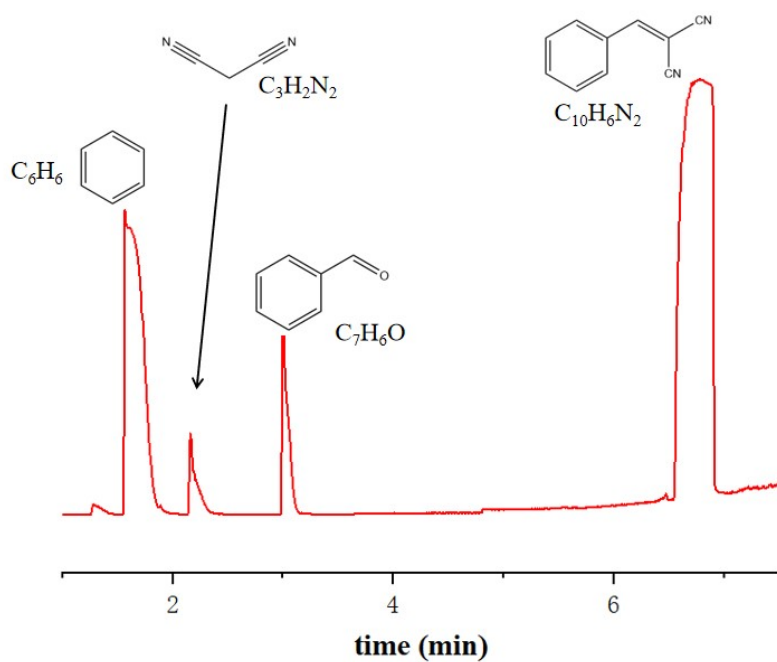

**Figure S22.** Typical chromatogram map for the product of Knoevenagel reactions.

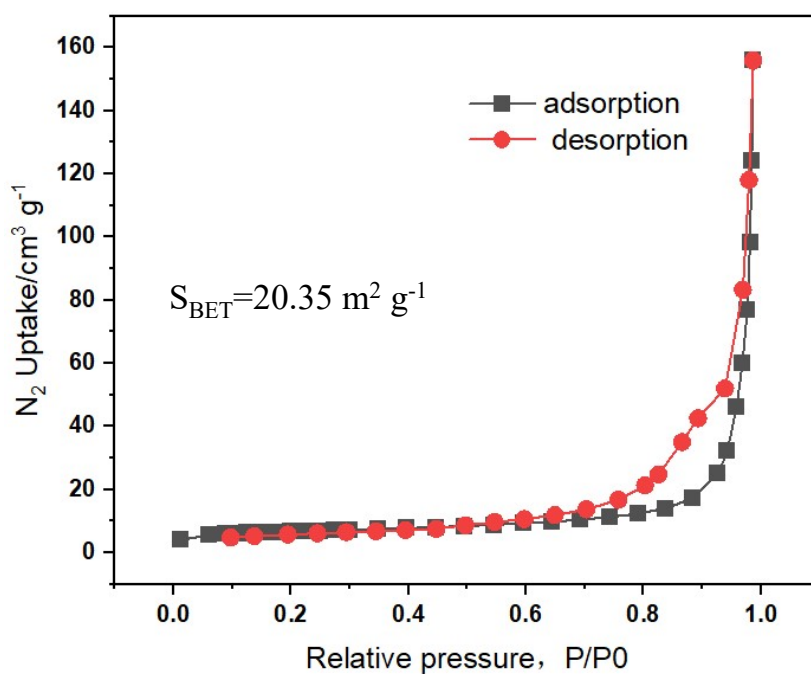

**Figure S23.** Nitrogen sorption isotherm of **BL** measured at 77K.



## Section S-14. Reaction condition studies

**Table S1. Synthesis of BL-TP-POP under different reaction conditions.**

| Entries | Solvents                        | Catalyst (HOAc)      |                | $S_{BET}$<br>( $m^2 g^{-1}$ ) | Form      |
|---------|---------------------------------|----------------------|----------------|-------------------------------|-----------|
|         |                                 | Concentration<br>(M) | Volume<br>(ml) |                               |           |
| 1       | o-DCB/ n-BuOH (2ml/2ml)         | 1                    | 0.2            | 217.2                         | amorphous |
| 2       | o-DCB/ n-BuOH (2ml/2ml)         | 1                    | 0.4            | 223.1                         | amorphous |
| 3       | o-DCB/ n-BuOH (2ml/2ml)         | 1                    | 0.8            | 321.7                         | amorphous |
| 4       | o-DCB/ n-BuOH (2ml/2ml)         | 3                    | 0.2            | 474.8                         | amorphous |
| 5       | o-DCB/ n-BuOH (2ml/2ml)         | 3                    | 0.4            | 443.9                         | amorphous |
| 6       | o-DCB/ n-BuOH (2ml/2ml)         | 3                    | 0.8            | 611.5                         | amorphous |
| 7       | o-DCB/ n-BuOH (3ml/1ml)         | 3                    | 0.2            | 270.9                         | amorphous |
| 8       | o-DCB/ n-BuOH (1ml/3ml)         | 3                    | 0.4            | 425.3                         | amorphous |
| 9       | Mesitylene/1,4-dioxane(1ml/3ml) | 3                    | 0.8            | 51.9                          | amorphous |
| 10      | Mesitylene/1,4-dioxane(2ml/2ml) | 3                    | 0.8            | 14.6                          | amorphous |

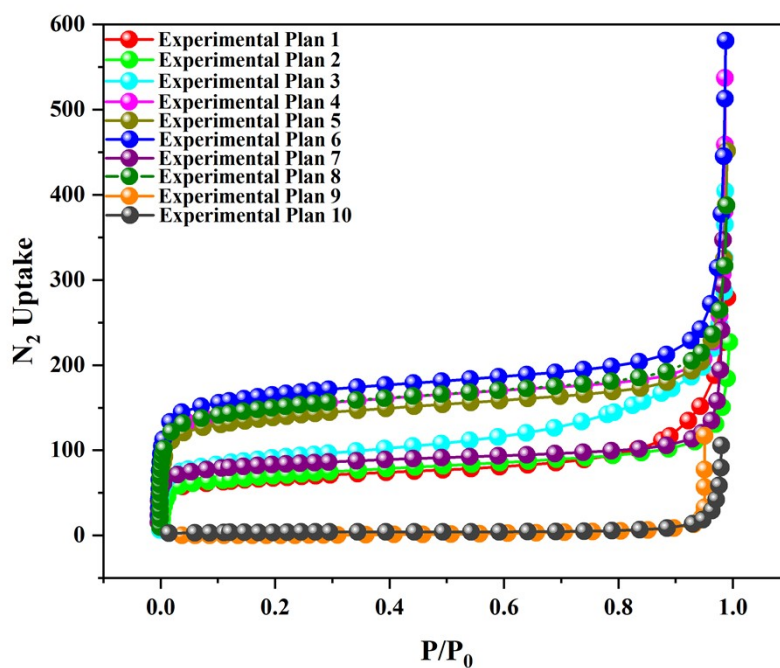

**Figure S24.** Nitrogen sorption isotherm measurement at 77K of different experimental plans.

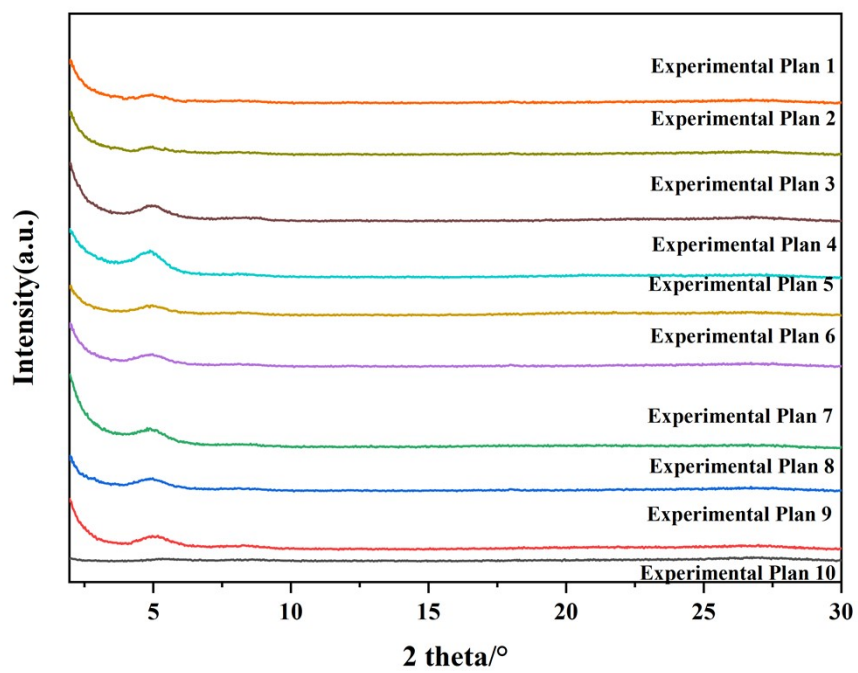

**Figure S25.** PXRD profiles of different experimental plans.

**Section S-15: CO<sub>2</sub> uptake capacity compared with other materials.**

**Table S2. CO<sub>2</sub> uptake capacities of different adsorbents**

| Porous Materials        | S <sub>BET</sub><br>(m <sup>2</sup> g <sup>-1</sup> ) | CO <sub>2</sub> uptake at<br>273K<br>(mg g <sup>-1</sup> ) | CO <sub>2</sub> uptake at<br>298K<br>(mg g <sup>-1</sup> ) | CO <sub>2</sub> /N <sub>2</sub><br>Selectivity | References |
|-------------------------|-------------------------------------------------------|------------------------------------------------------------|------------------------------------------------------------|------------------------------------------------|------------|
| BL-TP-POP               | 611.46                                                | 121.01                                                     | 99.63                                                      | 53.53                                          | this paper |
| NPOF-4                  | 1249                                                  | 110                                                        | 61.6                                                       | 27                                             | [2]        |
| Azo-COP-1               | 635.8                                                 | 107.36                                                     | 65.12                                                      | 63.7                                           | [3]        |
| PNOP-1                  | 830                                                   | 176                                                        | 106.48                                                     | 52.1                                           | [4]        |
| TMP1                    | 923                                                   | 154                                                        | 89.76                                                      | 64                                             | [5]        |
| TNHCP1                  | 848                                                   | 127.16                                                     | 96.8                                                       | 30                                             | [6]        |
| CMP-1-(OH) <sub>2</sub> | 1043                                                  | 79.2                                                       | 47.08                                                      | 45.2                                           | [7]        |
| NTP                     | 1067                                                  | 151.8                                                      | 80.08                                                      | 18                                             | [8]        |
| NPOP                    | 773                                                   | 91.96                                                      | 59.84                                                      | 30                                             | [9]        |
| azo-COP-2               | 729                                                   | 112.2                                                      | 67.32                                                      | 109.6                                          | [10]       |
| PECONF-3                | 851                                                   | 153.56                                                     | 108.68                                                     | 77                                             | [11]       |



*Section S-16: Studies of binding sites with Materials Studio*

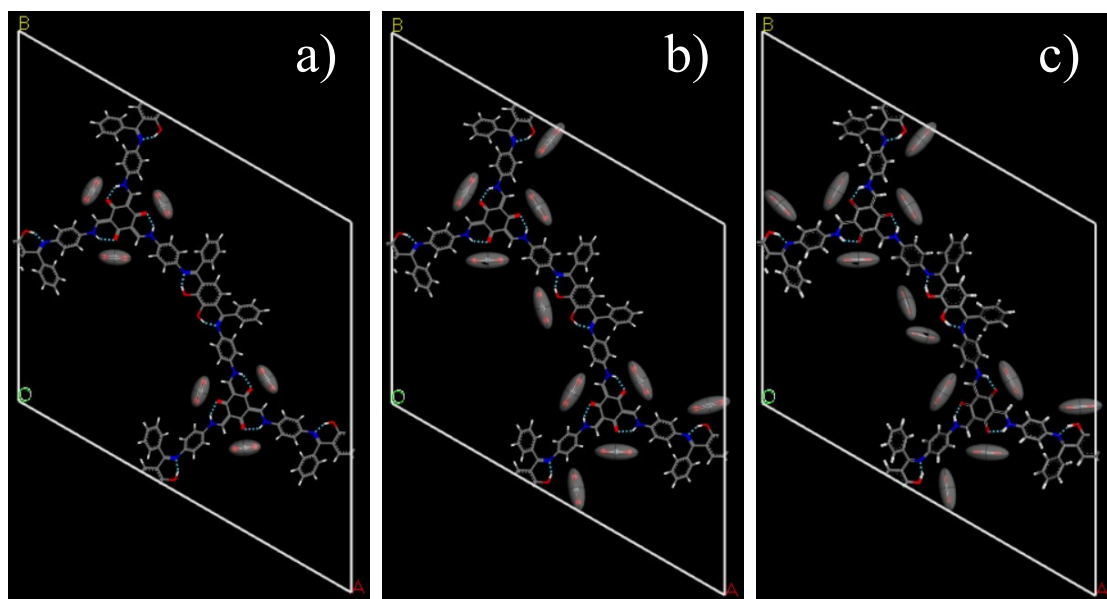

**Figure S26.** Simulation of binding sites with different numbers of CO<sub>2</sub> molecules in a unit cell. a) Six CO<sub>2</sub> molecules in a unit cell; b) Ten CO<sub>2</sub> molecules in a unit cell; c) Twelve CO<sub>2</sub> molecules in a unit cell.

## ***Section S-17: References***

1. R. Chen, J. Shi, Y. Ma, G. Lin, X. Lang and C. Wang, *Angew. Chem. Int. ed.*, 2019, **58**, 6430.
2. T. Islamoğlu, M. G. Rabbani and H. M. El-Kaderi, *J. Mater. Chem. A*, 2013, **1**, 10259.
3. H. A. Patel, S. H. Je, J. Park, Y. Jung, A. Coskun and C. T. Yavuz, *Chem. Eur. J.*, 2014, **20**, 772.
4. J. Yan, B. Zhang, S. Guo and Z. Wang, *ACS Appl. Nano Mater.*, 2021, **4**, 10565.
5. R. Bera, S. Mondal and N. Das, *Micropor. Mesopor. Mat.*, 2018, **257**, 253.
6. A. Hassan, S. Goswami, A. Alam, R. Bera and N. Das, *Sep. Purif. Technol.*, 2021, **257**, 117923.
7. R. Dawson, D. J. Adams and A. I. Cooper, *Chem. Sci.*, 2011, **2**, 1173.
8. H. Ma, J. J. Chen, L. Tan, J.-H. Bu, Y. Zhu, B. Tan and C. Zhang, *ACS Macro Lett.*, 2016, **5**, 1039.
9. A. Giri, N. N. Patil and A. Patra, *Chem. Commun.*, 2021, **57**, 4404.
10. H. A. Patel, S. H. Je, J. Park, D. P. Chen, Y. Jung and C. T. Yavuz, *Nat. Commun.*, 2013, **4**, 1357.
11. P. Mohanty, L. D. Kull and K. Landskron. *Nat. Commun.*, 2011, **2**, 401.
